# Supplementary material for: Simulation of Food Folate Digestion and Bioavailability of an Oxidation Product of 5-Methyltetrahydrofolate
Source: MDPI journal article supplement (doi:10.3390/nu9090969), 2017-09-01
Supplement: s1 [file s1]

## Supplementary Material

# Simulation of food folate digestion and bioavailability of an oxidation product of 5-methyltetrahydrofolate

**Table S1.** Deconjugation efficiency for PteGlu<sub>3</sub> and food folates in spinach using different additives for the digest.

| Additives                                                                                    | Deconjugation Efficiency |
|----------------------------------------------------------------------------------------------|--------------------------|
| PteGlu <sub>3</sub> + no additives                                                           | 0                        |
| PteGlu <sub>3</sub> + simulated digestion juices                                             | 1                        |
| PteGlu <sub>3</sub> + simulated digestion juices + 0.5 g brush-border-membrane* <sup>1</sup> | 9                        |
| PteGlu <sub>3</sub> + no additives + 0.5 g brush-border-membrane* <sup>1</sup>               | 40                       |
| PteGlu <sub>3</sub> + simulated digestion juices + 2.5 g brush-border-membrane* <sup>1</sup> | 97                       |
| PteGlu <sub>3</sub> + no additives + 2.5 g brush-border-membrane* <sup>1</sup>               | 100                      |
| Spinach + simulated digestion juices + 2.5 g brush-border-membrane* <sup>1</sup>             | 56                       |
| Spinach + no additives + 2.5 g brush-border-membrane* <sup>1</sup>                           | 82                       |
| Spinach + simulated digestion juices + 5 g brush-border-membrane* <sup>1</sup>               | 79                       |

\*<sup>1</sup> scraped brush-border-membrane (mucosa from pig's small intestine)
